# Supplementary material
Source: HighWire-hosted journal article supplement (https://www.cmajopen.ca/highwire/filestream/81333/field_highwire_adjunct_files/5/2019-0229-original-submission.pdf)
Supplement: 2019-0229-original-submission.pdf [file 2019-0229-original-submission.pdf]

1  
2  
3 **Title** Trends and Correlates of Cannabis Use in Canada: A Repeated Cross-Sectional Analysis of  
4  
5 National Surveys From 2004 to 2017  
6

7  
8 **Authors and affiliation**  
9

10 Dana E. Lowry, Ottawa Hospital Research Institute  
11

12 Daniel J. Corsi, Ottawa Hospital Research Institute, University of Ottawa  
13  
14

15  
16  
17 Keywords: cannabis, epidemiology, Canada, time trends, demographic factors  
18

19 Funding statement required  
20

21 Correspondence to: Daniel J Corsi, PhD, Centre for Practice Changing Research, 501 Smyth  
22

23 Road, Box 241, Ottawa, ON, K1H 8L6, Tel: 613-737-8899, ext 71190, email: [dcorsi@ohri.ca](mailto:dcorsi@ohri.ca)  
24  
25  
26  
27  
28  
29  
30  
31  
32  
33  
34  
35  
36  
37  
38  
39  
40  
41  
42  
43  
44  
45  
46  
47  
48  
49  
50  
51  
52  
53  
54  
55  
56  
57  
58  
59  
60

## ABSTRACT

**Background:** Cannabis was the most widely used illicit drug in Canada before legalization in 2018. Current time trends in cannabis use by demographic factors are not well known. We provide estimates of cannabis consumption by sex, age group, and geographic region for 2004-2017.

**Methods:** Data originated in the Canadian Tobacco Use Monitoring Survey and the Canadian Tobacco, Alcohol and Drugs Survey, and respondents were aged 15 years and older. The rate of cannabis use in 12 months before the survey was analyzed using logistic regression.

**Results:** 226,145 respondents (50.7% female) between 2004-2017 were analyzed. Between 2004 and 2017, the overall rate of cannabis use increased from 9.4% (95% CI, 8.7-10.1) to 14.8% (95% CI, 13.3-16.5) (P-trend <0.001). Male respondents reported consistently higher cannabis use compared to females. Cannabis use among ages 15-19 years decreased from 24.0% (95% CI, 22.0-26.2) in 2004 to 19.4% (95% CI, 17.5-21.5) in 2017 (P-trend <0.001). Across all age groups, those aged 20-24 years reported the highest prevalence of past-year cannabis consumption (28.2%, 95% CI, 27.4-29.0). The overall prevalence of cannabis use was highest in British Columbia (12.6%, 95% CI, 11.9-13.5), although rates among respondents aged 15-19 years and 20-24 years were highest in Quebec (26.6% [95% CI, 25.3-28.0] and 31.2% [95% CI, 29.6-32.8]), respectively.

**Interpretation:** Cannabis consumption in Canada has increased from 2004 to 2017 and varies based on sex, age and geographic region. Despite a general increase, adolescent cannabis consumption has decreased. Further studies are warranted that include post-legalization data and other sociodemographic factors.

## INTRODUCTION

As of October 2018, the Government of Canada legalized the recreational use of cannabis (marijuana) on a national level.<sup>1</sup> Before legalization, cannabis was the most widely used illicit drug in Canada,<sup>2</sup> and consumption has increased post-legislation according to the recently released National Cannabis Survey (NCS).<sup>3</sup> Data from the NCS suggests that a national increase of 3%, from 14% to 17%, in cannabis consumption has occurred within only two years following legalization.<sup>3</sup> The rise in the overall cannabis use may be due to increases in cannabis availability and circulation and decreases in the perception of harm,<sup>4,5</sup> all of which influence drug consumption. Indeed, along with overall increases in cannabis consumption, studies indicate that social acceptability and cannabis accessibility increase while the perception of harm decreases in US states that have legalized the recreational use of cannabis.<sup>6,7</sup> Also, survey data from the United States suggest sex, age, ethnicity and socioeconomic status dependent trends in cannabis consumption that may be influenced by changing social norms and new legislation.<sup>4,8,9</sup> Currently, no studies exist assessing the influence of different demographic factors on the trends in cannabis consumption across Canada. Cross-sectional studies evaluating the trends in cannabis use are essential to inform legislation and create public health policies that are appropriate to the current Canadian population. This study evaluated trends in cannabis use among Canadians between 2004 and 2017 and identified differences in prevalence according to sociodemographic factors.

## METHODS

### Data source

Data are from 12 nationally representative surveys carried out in Canada between 2004 and 2017. Questions regarding cannabis consumption were included in national surveys

1  
2  
3 beginning in 2004. The final dataset included two surveys: the Canadian Tobacco Use  
4 Monitoring Survey (CTUMS) (years 2004-2012) and the Canadian Tobacco, Alcohol and Drugs  
5 Survey (CTADS) (years 2013, 2015 and 2017). Statistics Canada conducted both surveys.  
6  
7  
8  
9  
10 CTUMS was conducted on an annual basis in two cycles (February to June and July to  
11 December) to monitor changes in smoking prevalence in the Canadian population. CTADS is an  
12 ongoing biennial survey that monitors the use of tobacco, alcohol and drugs across the Canadian  
13 population. Both surveys used a repeated cross-sectional design, a two-phase stratified random  
14 sample procedure, and collected data via random digit dialling telephone interviews with  
15 computer-assisted technology. The two-phase design was implemented to increase the number of  
16 respondents aged 15-19 years and 20-24 years. Both CTUMS and CTADS included individuals  
17 15 years and older in the ten provinces in Canada and excluded residents of the three territories,  
18 residents without a telephone and institutionalized individuals. The sample size for each CTUMS  
19 was approximately 20-21,000 respondents and approximately 14-16,000 respondents for each  
20 CTADS.  
21  
22  
23  
24  
25  
26  
27  
28  
29  
30  
31  
32  
33  
34

35 To examine rates of cannabis use in pregnancy, we use data from the Canadian Alcohol  
36 and Drug Monitoring Survey (CADUMS) between 2008-2010. To our knowledge, the  
37 CADUMS was the only survey that included questions about whether respondents were pregnant  
38 in the past year, along with past 12-month cannabis use. The CADUMS provides continuous  
39 information on alcohol and drug use habits across 10 Canadian provinces and is conducted by  
40 the Controlled Substances and Tobacco Directorate, Health Canada. The survey is a two-stage  
41 random sampling survey conducted using randomized digit dialling via computer-assisted  
42 telephone interviewing. Within the selected households, the individual (over 15 years of age)  
43 celebrating his/her birthday next would be chosen to complete the interview. Institutionalized  
44  
45  
46  
47  
48  
49  
50  
51  
52  
53  
54  
55  
56  
57  
58  
59  
60

1  
2  
3 individuals and full-time members of the Canadian Forces were excluded from the sample  
4  
5 population. The sample size for CADUMS varies between 10,000 and 16,000 respondents.  
6  
7

## 8 **Outcome**

9  
10 The primary outcome was past-year cannabis use, defined as a dichotomous variable  
11 (yes/no). The question regarding 12-month cannabis use in CTUMS and CTADS was,  
12  
13 respectively: “Have you used it (i.e. marijuana) in the past 12 months?” and “During the past 12  
14  
15 months have you used marijuana?”.  
16  
17  
18

## 19 **Covariates**

20  
21 The independent variables included were age, sex (self-reported) and geographic region.  
22  
23 Age was stratified into six groups: 15-19, 20-24, 25-29, 30-44, 45-64 and 65+. Geographic  
24  
25 region was defined as Atlantic (Nova Scotia, New Brunswick, Newfoundland and Labrador and  
26  
27 Prince Edward Island), Quebec, Ontario, Prairies (Manitoba, Saskatchewan and Alberta) and  
28  
29 British Columbia. The pregnancy sub-analyses included two additional independent variables:  
30  
31 childbearing age (defined as 18-44; yes/no) and pregnancy within the past 12-months (yes/no).  
32  
33  
34

## 35 **Statistical Analysis**

36  
37 A weighted estimate for cannabis consumption prevalence was calculated in each survey  
38  
39 for subgroups defined by age, sex and geographic region using sampling weights provided with  
40  
41 each survey. Logistic regression models were used to assess linear and quadratic trends in past-  
42  
43 year cannabis use by age, sex and geographic region. Models were first specified with linear  
44  
45 terms for year, and a second model was fit which included linear and quadratic terms. We  
46  
47 present trends as the weighted prevalence with a 95% confidence interval (CI). The criterion for  
48  
49 statistical significance was  $\alpha = 0.05$ . All analyses were performed using R statistical  
50  
51 software.  
52  
53  
54  
55  
56  
57  
58  
59  
60

## RESULTS

The total sample size across all surveys from 2004-2017 was 230,553 respondents. Of these respondents, we excluded 4,408 (1.9%) due to missing data on cannabis consumption, leaving a total analytical sample of 226,145, and 122,299 were female (weighted frequency 51%). The response rates by survey varied between 70.4% and 87.6% (sTable 1). The weighted pooled estimates for past 12-month cannabis consumption in 2004-2017 appear in Table 1 by sex, age and geographic region. Across the study period, males of all ages were more likely to use cannabis compared to females (13.2%, 95% CI, 12.7-13.6 vs 7.3%, 95% CI, 7.0-7.6). Combining males and females, British Columbia had the highest rate of cannabis use (12.7%), and Ontario had the lowest (9.5%). The rates of use were similar in the Atlantic (10.1%), Quebec (10.1%), and Prairie (10.1%) provinces. The relationship between cannabis use and age was non-linear and peaked at 33.7% among males and 22.5% among females aged 20-24 years (Figure 2). It was less than 1% among those aged 65 years and older.

Overall, cannabis consumption increased in Canada between 2004 and 2017 from 9.4% (95% confidence interval [CI], 8.7, 10.1) to 14.8% (95% CI, 13.3, 16.5, p-trend<0.001) (Figure 1). This trend indicated a statistically significant quadratic (p<0.001) effect, with a more rapid increase in prevalence after 2011 (Table 2).

### Trends by Sex

In 2004 the prevalence in cannabis consumption across Canada was 12.2% (95% CI, 10.9-13.4) in males and 6.6% (95% CI, 5.9-7.4) in females. By 2017, prevalence of cannabis use increased by 6.5% to 18.7% (95% CI, 16-21.4) in males and nearly doubled in females (to 11.1% [95% CI, 9.3-12.9]). Across all age groups and regions, males consistently reported greater past 12-month cannabis consumption compared to females (Figure 3), with the greatest overall

1  
2  
3 prevalence reported (in 2017) by males aged 25-29 at 45.8% (95% CI, 32.0-60.4). Increases were  
4  
5 demonstrated between 2004 and 2017 for male and female respondents aged 20-24 years, 25-29  
6  
7 years, 30-44 years, and 45-64 years. In these age groups, the prevalence of 12-month cannabis  
8  
9 consumption remained relatively stable between 2004 and 2011 and generally increased from  
10  
11 2012-2017.  
12  
13

### 14 **Trends by Age**

15  
16 Recently, individuals aged 25-29 years reported a significant increase in past 12-month  
17  
18 cannabis consumption (**Table 2**). In 2013, 19.2% (95% CI, 12.8-27.7) of individuals aged 25-29  
19  
20 years reported consuming cannabis in the past year; this increased to 30.4% (95% CI, 23.9-37.7)  
21  
22 in 2015 and 34.6% (95% CI, 25.2-45.4) in 2017. Among the youngest age group, 15-19 years,  
23  
24 there was a significant linear ( $p=0.001$ ) and quadratic ( $p<0.001$ ) declining trend in past-year  
25  
26 cannabis use, from 24.0% in 2004 to 19.4% in 2017.  
27  
28  
29

30  
31 Among respondents aged 20-24 years, only the quadratic trend was statistically  
32  
33 significant ( $p<0.001$ ), driven by more recent increases since 2013. Among respondents aged 25-  
34  
35 29, 30-44 years, and 45-64 years, both linear and quadratic trends in past 12-month cannabis  
36  
37 consumption were statistically significant ( $p<0.05$ ), indicating increases in past 12-month  
38  
39 cannabis use. A statistically significant linear trend was also observed among respondents 65  
40  
41 years of age and older, with increases mainly occurring since 2012. The prevalence of cannabis  
42  
43 use was lower among those aged 65 years and above and increased from 0.23% in 2004 to 3.0%  
44  
45 in 2017.  
46  
47  
48

### 49 **Trends in Cannabis Use by Region**

50  
51 In 2004-2017, Quebec residents aged 15-19 and 20-24 years reported the greatest past-  
52  
53 year cannabis consumption (26.6% [95% CI, 25.3-28.0]; 31.2% [95% CI, 29.6-32.8]), whereas  
54  
55  
56  
57  
58  
59  
60

1  
2  
3 residents of British Columbia reported the greatest past-year cannabis use among individuals  
4 aged 25-29, 30-44, 45-64 and 65+ (25.1% [95% CI, 19.9-31.3]; 13.7% [95% CI, 12.0-15.7];  
5 7.7% [95% CI, 6.8-8.8]; 2.2% [95% CI, 1.5-3.2]) (**Table 2**). Past-year cannabis consumption in  
6 all regions was relatively stable until 2013 when consumption started to increase, except for  
7 Quebec (11.2% in 2013 vs 11.0% in 2017) (**Figure 4**). In the Atlantic Provinces, the Prairies,  
8 and British Columbia, cannabis consumption increased across both sexes; British Columbia had  
9 the greatest increase in cannabis consumption overall (increasing from 10.8% in 2011 to 23.4%  
10 in 2017). Cannabis consumption in Ontario increased in males (10.3% in 2011 to 14.4% in  
11 2017), but female consumption increased until 2015 and decreased again in 2017 (8.6% in 2015  
12 vs 6.6% in 2017) (**Figure 4**).

### 25 **Cannabis consumption and pregnancy**

26  
27 We used data from CADUMS between the years 2008 and 2010 to investigate past-12-  
28 month cannabis consumption among women of child-bearing age (ages 15-44) and those that  
29 were pregnant within one year of the survey. Between 2008 and 2010, the prevalence of cannabis  
30 consumption decreased from 14.5% (95% CI, 12.2-17.2) to 11.4% (95% CI, 9.8-13.2) among  
31 women of child-bearing age ( $p=0.043$ ). However, among women reporting pregnancies in the  
32 past year, the prevalence of past-year cannabis consumption was 9.7% (95% CI, 5.2-17.6) in  
33 2008, 4.4% (95% CI, 1.8-10.3) in 2009, and 7.6% (95% CI, 4.3-13.1) in 2010, and no trend was  
34 identified ( $p=0.57$ ). Across all years, the prevalence of cannabis use among women who were  
35 recently pregnant was 7.3% (9% CI, 5.0-10.7).

### 48 **DISCUSSION**

49  
50 Our results indicate the prevalence of past-year cannabis consumption varied by age, sex  
51 and geographic region, whereas time trends of cannabis use varied by age between 2004-2017.  
52  
53  
54  
55  
56  
57  
58  
59  
60



1  
2  
3 Overall, Canadian cannabis consumption has increased 5% from 9.4% to 14.8% over 13 years, a  
4  
5 58% relative increase. Despite a general increase in cannabis consumption, we find a decreasing  
6  
7 trend in past-year cannabis use among adolescents aged 15-19 years. Compared to females,  
8  
9 males consistently reported higher cannabis consumption over time, age and region. Lastly, the  
10  
11 overall prevalence of cannabis consumption was highest in British Columbia, although Quebec  
12  
13 had the highest reported among young adults under 25 years of age.  
14  
15

16  
17 National data on cannabis consumption is scarce in Canada; only two studies have  
18  
19 evaluated time trends of cannabis use.<sup>3, 10</sup> Using data from Ontario and Alberta secondary school  
20  
21 students, Zuckerman et al., reported a steady decrease in past-year adolescent cannabis  
22  
23 consumption between 2012 and 2015, followed by a rise in cannabis use between 2016 and  
24  
25 2018. However, the use of a convenience sample makes these results less generalizable to a  
26  
27 national population. Secondly, the National Cannabis Survey (NCS), a set of stratified  
28  
29 population-based surveys conducted by Statistics Canada and reported quarterly, has  
30  
31 demonstrated similar results to the trend trajectory of cannabis consumption outlined in our  
32  
33 results.<sup>3</sup> According to the NCS, between January 2018 and September 2019, the prevalence of  
34  
35 past 3-month cannabis use increased from 14% to 17.1%, remaining greater in males compared  
36  
37 to females.<sup>3</sup> Although the NCS reports an increased prevalence of cannabis consumption among  
38  
39 ages 15-24 years, our results suggest this increase may primarily be driven by the 20-24 years  
40  
41 age group and may mask a decrease in prevalence among ages 15-19 years.  
42  
43  
44  
45

46  
47 Research conducted in the United States has shown similar trends in the prevalence of  
48  
49 cannabis use.<sup>3, 4, 8, 9, 11</sup> All previous work has reported a higher prevalence of cannabis  
50  
51 consumption, either past 12- or 3-months, in males compared to females. Data from the United  
52  
53 States reflect a similar prevalence in cannabis consumption according to age group.<sup>4, 8, 11</sup> In line  
54  
55  
56  
57  
58  
59  
60

1  
2  
3 with our findings, recent studies using nation-wide surveys indicate an increase in adult (18+  
4 years) cannabis consumption, past 12- or 3-months, and a decrease in cannabis use among  
5 adolescents (12-17 years). Of particular interest is work by Anderson *et al.*<sup>12</sup> that garnered  
6 substantial controversy over its reports of declining rates in youth cannabis consumption post-  
7 legalization of recreational cannabis.<sup>13-17</sup> Addressing key methodological concerns, Anderson *et*  
8 *al.* published additional data suggesting that recreational cannabis laws in the U.S. may be  
9 associated with an 8% decrease (OR 0.92; 95% CI, 0.87-0.96) in past-month use and a 9%  
10 decrease (OR 0.91; 95% CI, 0.84-0.98) in heavy (over ten days per month) use among U.S.  
11 students in grades 9-12.<sup>18</sup> Few states had sufficient post-legalization data, limiting the ability to  
12 draw inferences from the data.<sup>16</sup> We find a similar trend in this age-group before legalization,  
13 which suggests a possible age effect in addition to any potential effect from the policy change.  
14  
15  
16  
17  
18  
19  
20  
21  
22  
23  
24  
25  
26  
27

28 Evidence of similar trends in American and Canadian cannabis consumption can aid to  
29 inform trends in drug use and the reformation of new and existing legislation. Policies that have  
30 shown a public health benefit in some U.S. states, including the introduction of potency laws,  
31 increases in tax on cannabis products, and minimum unit pricing, could be considered in the  
32 Canadian context.<sup>19</sup> There are currently no Canadian data regarding the accessibility,  
33 acceptability and attitudes towards recreational cannabis use. However, evidence from the U.S.  
34 suggests that recreational cannabis legalization leads to increases in positive attitudes towards  
35 cannabis use that may contribute to the increases in consumption.<sup>4, 6, 20, 21</sup> Importantly, the  
36 potential health risks associated with cannabis consumption need to be adequately communicated  
37 to the public to ensure that perceptibility of harm does not decrease with legalization, as it has in  
38 some U.S. states, and thus encourage cannabis consumption.<sup>7</sup> Also, cannabis legislation should  
39 prioritize public health messages of harm to vulnerable populations, including adolescents and  
40  
41  
42  
43  
44  
45  
46  
47  
48  
49  
50  
51  
52  
53  
54  
55  
56  
57  
58  
59  
60

1  
2  
3 pregnant women, and regarding more harmful modes of consumption, i.e. smoking and risks of  
4 inhaling carcinogens. Indeed, our sub-analyses indicate a substantial number of pregnant women,  
5  
6 inhaling carcinogens. Indeed, our sub-analyses indicate a substantial number of pregnant women,  
7  
8 up to 7%, may consume perinatally. Recently, up to 2% of pregnant women in an Ontario birth  
9  
10 cohort reported using cannabis while pregnant, and this increased to over 6% among women  
11  
12 aged 15-24 years.<sup>22</sup> Substantial evidence exists to highly discourage the use of cannabis during  
13  
14 pregnancy;<sup>23</sup> however, the current increasing trends in cannabis consumption in pregnancy  
15  
16 indicate that significant challenges remain in informing women and their health care providers  
17  
18 about the potential risks of cannabis in pregnancy.<sup>24</sup>  
19  
20

21  
22 There are limitations to the present study. First, cannabis consumption was a self-reported  
23  
24 measure. Self-reporting may under or overestimate the true prevalence due to social desirability  
25  
26 or biases. Secondly, we only assessed past 12-month cannabis consumption because it was the  
27  
28 most consistently answered question in both the CTUMS and CTADS. However, other measures  
29  
30 of cannabis consumption in time and frequency (i.e. past 3-months, occasional/daily use) would  
31  
32 be valuable topics of further inquiry. Also, the data presented dates before the legalization of  
33  
34 recreational cannabis use in Canada, and thus cannot assess the influence of the new legislature  
35  
36 on cannabis consumption. Lastly, our study lacks a diversity of sociodemographic factors to  
37  
38 capture contextual differences in cannabis consumption trends. Future studies should consider  
39  
40 education as a covariate to cannabis consumption, considering it is a major socioeconomic factor  
41  
42 influencing cigarette smoking, alcohol and illicit drug consumption.  
43  
44  
45

46  
47 In conclusion, the prevalence of past 12-month cannabis consumption in Canadians  
48  
49 varied by sex, age and geographic region. Overall, cannabis consumption has increased from  
50  
51 9.4% in 2004 to 14.8% in 2017 and remained more prevalent in males than females. Despite  
52  
53 overall increases in cannabis consumption, our results demonstrated a steady decrease in  
54  
55  
56  
57  
58  
59  
60

1  
2  
3  
4  
5  
6  
7  
8  
9  
10  
11  
12  
13  
14  
15  
16  
17  
18  
19  
20  
21  
22  
23  
24  
25  
26  
27  
28  
29  
30  
31  
32  
33  
34  
35  
36  
37  
38  
39  
40  
41  
42  
43  
44  
45  
46  
47  
48  
49  
50  
51  
52  
53  
54  
55  
56  
57  
58  
59  
60

cannabis use among adolescents aged 15-19 years. Further analyses of Canadian cannabis consumption post-legalization, across other sociodemographic factors (i.e. education and socioeconomic status), will be essential to advise public health policies and inform future policies.

Confidential

1  
2  
3  
4  
5  
6  
7  
8  
9

## TABLES AND FIGURES

**Table 1: Prevalence of 12-month Cannabis Consumption by Age, Sex and Province of Residence: CTUMS and CTADS 2004-2017.**

| Province/Sex     | Age Group % (95% CI) |                     |                     |                     |                     |                    |                     |
|------------------|----------------------|---------------------|---------------------|---------------------|---------------------|--------------------|---------------------|
|                  | All ages             | 15-19               | 20-24               | 25-29               | 30-44               | 45-64              | 65+                 |
| Canada           |                      |                     |                     |                     |                     |                    |                     |
| Both             | 10.2<br>(9.9–10.5)   | 22.4<br>(21.8–23)   | 28.2<br>(27.4–29)   | 20.8<br>(19–22.7)   | 9.8<br>(9.1–10.4)   | 5.1<br>(4.8–5.5)   | 0.81<br>(0.61–1)    |
| Male             | 13.2<br>(12.7–13.6)  | 24.9<br>(24–25.8)   | 33.7<br>(32.5–34.9) | 26.7<br>(23.8–29.6) | 13.2<br>(12.2–14.3) | 6.9<br>(6.4–7.5)   | 1.1<br>(0.78–1.5)   |
| Female           | 7.3<br>(7–7.6)       | 19.8<br>(18.9–20.6) | 22.5<br>(21.5–23.5) | 15<br>(12.9–17.1)   | 6.3<br>(5.6–7)      | 3.4<br>(3–3.8)     | 0.5<br>(0.33–0.73)  |
| Atlantic         |                      |                     |                     |                     |                     |                    |                     |
| Both             | 10.1<br>(9.6–10.7)   | 21.4<br>(20–22.8)   | 27.8<br>(26–29.5)   | 20.9<br>(16.9–24.9) | 10.4<br>(9–11.8)    | 6.0<br>(5.3–6.7)   | 0.9<br>(0.5–1.3)    |
| Male             | 13.2<br>(12.3–14.1)  | 23.7<br>(21.9–25.5) | 34.1<br>(31.3–36.9) | 24.9<br>(19.1–30.7) | 14.6<br>(12.2–16.9) | 8.0<br>(6.9–9.3)   | 1.4<br>(0.7–2.2)    |
| Female           | 7.2<br>(6.5–7.9)     | 19<br>(16.8–21.8)   | 21.1<br>(19.2–22.9) | 17<br>(11.2–22.9)   | 6.5<br>(5–8)        | 4.0<br>(3.2–5.0)   | 0.5<br>(0.1–0.8)    |
| Quebec           |                      |                     |                     |                     |                     |                    |                     |
| Both             | 10.1<br>(9.6–10.7)   | 26.6<br>(25.2–28)   | 31.2<br>(29.6–32.8) | 21.3<br>(18–24.6)   | 9.7<br>(8.4–11)     | 4.2<br>(3.6–4.9)   | 0.6<br>(0.1–1.1)    |
| Male             | 13.2<br>(12.3–14.2)  | 30.2<br>(28.3–32.2) | 38.7<br>(36.3–41.1) | 27.5<br>(22.2–32.8) | 13.3<br>(11.1–15.6) | 5.6<br>(4.5–6.8)   | 1.0<br>(0.3–2.7)    |
| Female           | 7.1<br>(6.5–7.3)     | 22.9<br>(21.0–24.7) | 23.4<br>(21.3–25.4) | 15.2<br>(11.3–19)   | 5.9<br>(4.7–7.1)    | 2.9<br>(2.1–3.6)   | 0.3<br>(0.1–0.9)    |
| Ontario          |                      |                     |                     |                     |                     |                    |                     |
| Both             | 9.5<br>(8.9–10)      | 20.8<br>(19.5–22.1) | 27.7<br>(26–29.3)   | 20.5<br>(16.7–24.3) | 8.3<br>(7.1–9.5)    | 4.5<br>(3.9–5.1)   | 0.52<br>(0.23–0.81) |
| Male             | 12.3<br>(11.4–13.2)  | 23.4<br>(21.5–25.3) | 31.6<br>(29.2–34)   | 28.6<br>(22.3–35)   | 11.4<br>(9.4–13.5)  | 6.0<br>(5.0–7.2)   | 0.93<br>(0.32–1.5)  |
| Female           | 6.7<br>(6.2–7.3)     | 18.1<br>(16.4–19.9) | 23.5<br>(21.3–25.6) | 12.6<br>(8.8–16.5)  | 5.3<br>(4.1–6.5)    | 3.0<br>(2.4–3.8)   | 0.19<br>(0.01–0.37) |
| Prairies         |                      |                     |                     |                     |                     |                    |                     |
| Both             | 10.1<br>(9.7–10.6)   | 20.4<br>(19.5–21.3) | 25.8<br>(24.7–27)   | 18.3<br>(15.5–21.2) | 9.7<br>(8.7–10.8)   | 5.2<br>(4.6–5.8)   | 0.56<br>(0.34–0.77) |
| Male             | 13.1<br>(12.3–13.8)  | 22.3<br>(21–23.6)   | 31.4<br>(29.7–33)   | 24<br>(19.1–28.8)   | 12.9<br>(11.3–14.6) | 7.1<br>(6.1–8.1)   | 0.53<br>(0.25–0.82) |
| Female           | 7.2<br>(6.7–7.7)     | 18.4<br>(17.2–19.7) | 20<br>(18.5–21.6)   | 12.3<br>(9.9–14.7)  | 6.3<br>(5.1–7.6)    | 3.3<br>(2.7–3.9)   | 0.57<br>(0.25–0.9)  |
| British Columbia |                      |                     |                     |                     |                     |                    |                     |
| Both             | 12.7<br>(11.9–13.5)  | 23.9<br>(22.5–25.4) | 28.9<br>(27.1–30.7) | 25.1<br>(19.4–30.9) | 13.7<br>(12.0–15.7) | 7.7<br>(6.8–8.8)   | 2.2<br>(1.5–3.2)    |
| Male             | 15.6<br>(14.8–16.9)  | 25.7<br>(23.6–27.8) | 34.6<br>(31.8–37.3) | 25.7<br>(17.6–33.8) | 18.1<br>(15.2–21)   | 10.5<br>(8.8–12.2) | 2.4<br>(1.5–3.8)    |
| Female           | 9.8<br>(8.7–10.9)    | 22<br>(20–24.1)     | 23<br>(20.6–25.4)   | 24.6<br>(16.5–32.7) | 9.5<br>(7.2–11.9)   | 5.0<br>(4.0–6.2)   | 1.9<br>(0.69–3.15)  |

1  
2  
3  
4  
5  
6  
7  
8  
9  
10  
11  
12  
13  
14  
15  
16  
17  
18  
19  
20  
21  
22  
23  
24  
25  
26  
27  
28  
29  
30  
31  
32  
33  
34  
35  
36  
37  
38  
39  
40  
41  
42  
43  
44  
45  
46  
47

**Table 2:** Age-Specific Trends in 12-month Cannabis Consumption in Canadian Adolescents and Adults for 2004-2017: CTUMS and CTADS.

| Survey Year              | All ages |      | 15-19  |      | 20-24  |      | 25-29  |      | 30-44  |      | 45-64  |     | 65+    |      |
|--------------------------|----------|------|--------|------|--------|------|--------|------|--------|------|--------|-----|--------|------|
|                          | n        | %    | n      | %    | n      | %    | n      | %    | n      | %    | n      | %   | n      | %    |
| 2004                     | 2864     | 9.4  | 1125   | 24.0 | 1116   | 27.0 | 160    | 18.8 | 287    | 7.6  | 166    | 4.1 | 10     | 0.23 |
| 2005                     | 3119     | 9.7  | 1281   | 25.8 | 1200   | 30.0 | 151    | 16.5 | 283    | 8.1  | 199    | 4.5 | 5      | 0.06 |
| 2006                     | 3174     | 9.5  | 1280   | 23.3 | 1222   | 28.2 | 157    | 17.1 | 295    | 8.5  | 212    | 4.1 | 8      | 0.27 |
| 2007                     | 2935     | 9.4  | 1169   | 23.0 | 1113   | 26.9 | 179    | 18.1 | 263    | 8.6  | 203    | 4.0 | 8      | 0.30 |
| 2008                     | 2741     | 9.0  | 1058   | 21.5 | 1056   | 29.4 | 157    | 14.1 | 237    | 7.8  | 221    | 4.4 | 12     | 0.45 |
| 2009                     | 2648     | 9.3  | 1106   | 21.6 | 956    | 26.9 | 123    | 17.6 | 259    | 9.5  | 199    | 4.2 | 5      | 0.11 |
| 2010                     | 2541     | 8.9  | 978    | 20.9 | 981    | 26.3 | 113    | 19.4 | 234    | 7.9  | 221    | 3.9 | 14     | 0.64 |
| 2011                     | 2678     | 9.3  | 1063   | 22.0 | 1001   | 25.6 | 106    | 20.3 | 222    | 7.5  | 267    | 5.1 | 19     | 0.51 |
| 2012                     | 2507     | 10.2 | 1002   | 20.8 | 930    | 27.3 | 93     | 23.8 | 229    | 10.2 | 223    | 4.6 | 30     | 1.1  |
| 2013                     | 1972     | 10.6 | 753    | 22.4 | 687    | 26.2 | 74     | 19.2 | 211    | 12.0 | 225    | 6.1 | 22     | 0.73 |
| 2015                     | 2078     | 12.3 | 509    | 20.6 | 728    | 29.7 | 163    | 30.4 | 317    | 13.4 | 306    | 7.0 | 55     | 1.6  |
| 2017                     | 3505     | 14.8 | 1025   | 19.4 | 1732   | 33.2 | 123    | 34.6 | 234    | 17.4 | 347    | 9.4 | 44     | 3.0  |
| <b>P value for trend</b> |          |      |        |      |        |      |        |      |        |      |        |     |        |      |
| Model 1: Linear          | <0.001   |      | <0.001 |      | 0.239  |      | <0.001 |      | <0.001 |      | <0.001 |     | <0.001 |      |
| Model 2: Linear          | 0.001    |      | <0.001 |      | 0.300  |      | 0.005  |      | <0.001 |      | 0.002  |     | <0.001 |      |
| Model 2: Quadratic       | <0.001   |      | 0.236  |      | <0.001 |      | 0.025  |      | 0.002  |      | <0.001 |     | 0.547  |      |

\*unweighted sample size of past 12-month cannabis use

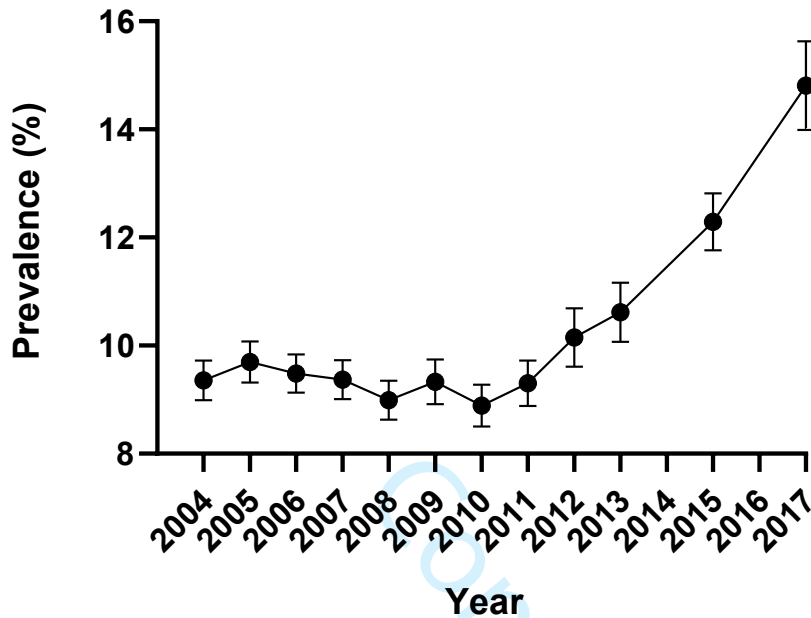

**Figure 1:** Prevalence of 12-month Cannabis Consumption in Canadian Adolescents and Adults Aged 15-65+ for 2004-2017: CTUMS and CTADS.

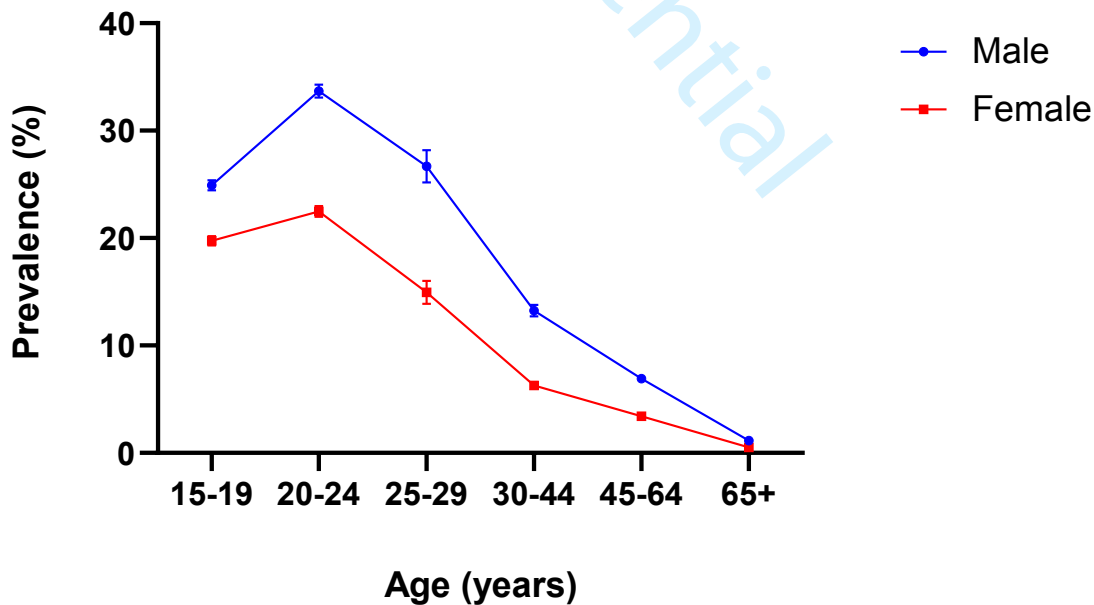

**Figure 2:** Weighted Estimates of 12-month Cannabis Consumption for Canadian Adolescents and Adults for 2004-2017: CTUMS and CTADS.

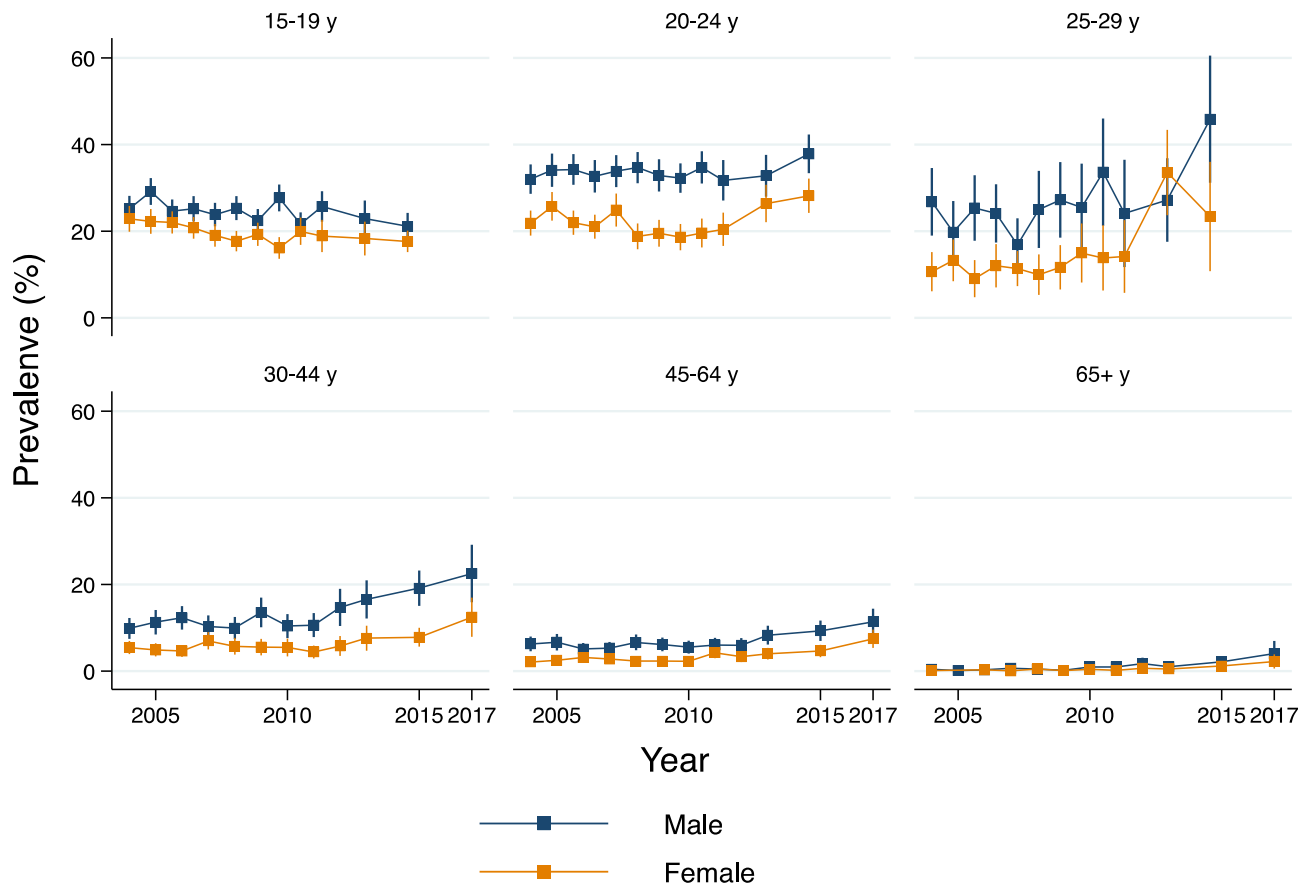

**Figure 3** Trends in prevalence of past-year cannabis consumption by respondent sex and age group, Canada 2004-2017



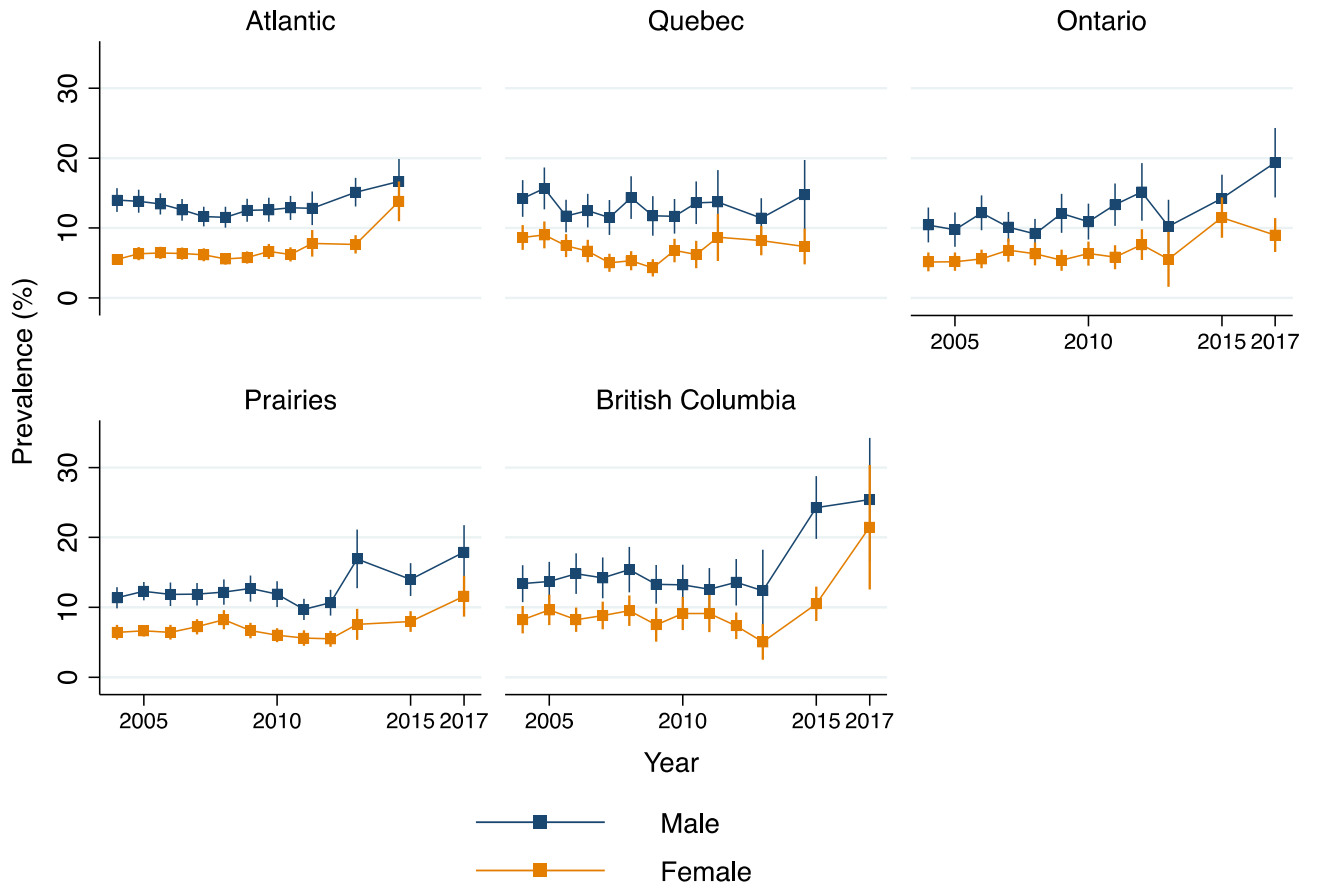

**Figure 4** Trends in prevalence of past-year cannabis consumption by respondent sex and geographic region, Canada 2004-2017

**APPENDIX****sTable 1:** The response rates for surveys years 2004-2017.

| <b>Survey Year</b> | <b>Survey Title</b> | <b>Response Rate (%)</b> |
|--------------------|---------------------|--------------------------|
| 2004               | CTUMS               | 87.6                     |
| 2005               | CTUMS               | 84.1                     |
| 2006               | CTUMS               | 86.5                     |
| 2007               | CTUMS               | 86.5                     |
| 2008               | CTUMS               | 86.3                     |
| 2009               | CTUMS               | 85.1                     |
| 2010               | CTUMS               | 84.2                     |
| 2011               | CTUMS               | 83.9                     |
| 2012               | CTUMS               | 83.0                     |
| 2013               | CTADS               | 81.8                     |
| 2015               | CTADS               | 79.0                     |
| 2017               | CTADS               | 70.4                     |

## REFERENCES

1. Government of Canada. A framework for the legalization and regulation of cannabis in Canada. Ottawa: Health Canada; 2016.
2. Government of Canada. Canadian Tobacco Alcohol and Drugs Survey (CTADS). 2017.
3. Statistics Canada. Table 13-10-0383-01 Prevalence of cannabis use in the past three months, self-reported.
4. Carliner H, Brown QL, Sarvet AL, Hasin DS. Cannabis use, attitudes, and legal status in the U.S.: A review. *Prev Med*. 2017;104:13-23.
5. Pacula RL, Powell D, Heaton P, Sevigny EL. Assessing the effects of medical marijuana laws on marijuana use: the devil is in the details. *J Policy Anal Manage*. 2015;34(1):7-31.
6. McGinty EE, Niederdeppe J, Heley K, Barry CL. Public perceptions of arguments supporting and opposing recreational marijuana legalization. *Prev Med*. 2017;99:80-6.
7. Wadsworth E, Hammond D. Differences in patterns of cannabis use among youth: Prevalence, perceptions of harm and driving under the influence in the USA where non-medical cannabis markets have been established, proposed and prohibited. *Drug Alcohol Rev*. 2018;37(7):903-11.
8. Hasin DS, Shmulewitz D, Sarvet AL. Time trends in US cannabis use and cannabis use disorders overall and by sociodemographic subgroups: a narrative review and new findings. *Am J Drug Alcohol Abuse*. 2019:1-21.
9. Chawla D, Yang YC, Desrosiers TA, Westreich DJ, Olshan AF, Daniels JL. Past-month cannabis use among U.S. individuals from 2002-2015: An age-period-cohort analysis. *Drug Alcohol Depend*. 2018;193:177-82.
10. Zuckermann AME, Battista K, de Groh M, Jiang Y, Leatherdale ST. Prelegalisation patterns and trends of cannabis use among Canadian youth: results from the COMPASS prospective cohort study. *BMJ Open*. 2019;9(3):e026515.
11. Mauro PM, Carliner H, Brown QL, Hasin DS, Shmulewitz D, Rahim-Juwel R, et al. Age Differences in Daily and Nondaily Cannabis Use in the United States, 2002-2014. *J Stud Alcohol Drugs*. 2018;79(3):423-31.
12. Anderson DM, Hansen B, Rees DI, Sabia JJ. Association of Marijuana Laws With Teen Marijuana Use: New Estimates From the Youth Risk Behavior Surveys. *JAMA Pediatr*. 2019.
13. Cannon M. Challenging the Association of Marijuana Laws With Teen Marijuana Use. *JAMA Pediatr*. 2019.
14. Jones CM, Underwood JM, Volkow ND. Challenging the Association of Marijuana Laws With Teen Marijuana Use. *JAMA Pediatr*. 2019.
15. Kamer R. Challenging the Association of Marijuana Laws With Teen Marijuana Use. *JAMA Pediatr*. 2019.
16. Miller CL. Challenging the Association of Marijuana Laws With Teen Marijuana Use. *JAMA Pediatr*. 2019.
17. Rapoport E, Keim SA, Adelman A. Challenging the Association of Marijuana Laws With Teen Marijuana Use. *JAMA Pediatr*. 2019.
18. Anderson DM, Rees DI, Sabia JJ. Challenging the Association of Marijuana Laws With Teen Marijuana Use-Reply. *JAMA Pediatr*. 2019.
19. Shover CL, Humphreys K. Six policy lessons relevant to cannabis legalization. *Am J Drug Alcohol Abuse*. 2019;45(6):698-706.

- 1
  - 2
  - 3
  - 4
  - 5
  - 6
  - 7
  - 8
  - 9
  - 10
  - 11
  - 12
  - 13
  - 14
  - 15
  - 16
  - 17
  - 18
  - 19
  - 20
  - 21
  - 22
  - 23
  - 24
  - 25
  - 26
  - 27
  - 28
  - 29
  - 30
  - 31
  - 32
  - 33
  - 34
  - 35
  - 36
  - 37
  - 38
  - 39
  - 40
  - 41
  - 42
  - 43
  - 44
  - 45
  - 46
  - 47
  - 48
  - 49
  - 50
  - 51
  - 52
  - 53
  - 54
  - 55
  - 56
  - 57
  - 58
  - 59
  - 60
20. Berg CJ, Stratton E, Schauer GL, Lewis M, Wang Y, Windle M, et al. Perceived harm, addictiveness, and social acceptability of tobacco products and marijuana among young adults: marijuana, hookah, and electronic cigarettes win. *Subst Use Misuse*. 2015;50(1):79-89.
21. Resko S, Ellis J, Early TJ, Szechy KA, Rodriguez B, Agius E. Understanding Public Attitudes Toward Cannabis Legalization: Qualitative Findings From a Statewide Survey. *Subst Use Misuse*. 2019;54(8):1247-59.
22. Corsi DJ, Hsu H, Weiss D, Fell DB, Walker M. Trends and correlates of cannabis use in pregnancy: a population-based study in Ontario, Canada from 2012 to 2017. *Can J Public Health*. 2019;110(1):76-84.
23. Gunn JK, Rosales CB, Center KE, Nunez A, Gibson SJ, Christ C, et al. Prenatal exposure to cannabis and maternal and child health outcomes: a systematic review and meta-analysis. *BMJ Open*. 2016;6(4):e009986.
24. Corsi DJ, Walsh L, Weiss D, Hsu H, El-Chaar D, Hawken S, et al. Association Between Self-reported Prenatal Cannabis Use and Maternal, Perinatal, and Neonatal Outcomes. *JAMA*. 2019;322(2):145-52.

Confidential
